# Supplementary material
Source: PubMed Central journal article supplement (PMC7902292)
Supplement: NIHMS1639975-supplement-1.pdf [file NIHMS1639975-supplement-1.pdf]

**Appendix**  
**Geographic Variation in Human Papillomavirus Vaccination Initiation and Completion Among Young Adults in the U.S.**  
**Adjei Boakye et al.**

**Appendix Table 1.** HPV Vaccine Initiation and Completion Rates of Young Adults Aged 18–26 Years, BRFSS (2015–2017)

| Variable                    | n (w%)           |                                 |                                    |                                | p-value           |
|-----------------------------|------------------|---------------------------------|------------------------------------|--------------------------------|-------------------|
|                             | Total<br>n=6,303 | Southern<br>n=10,354<br>(80.0%) | West/Midwest<br>n=5,295<br>(11.8%) | Northeast<br>n=2,429<br>(8.2%) |                   |
| HPV vaccine initiation: yes | 2,318 (35.3)     | 33.4                            | 33.9                               | 55.9                           | <b>&lt;0.0001</b> |
| HPV vaccine completion: yes | 1,220 (16.3)     | 14.5                            | 17.7                               | 30.9                           | <b>&lt;0.0001</b> |

*Note:* Boldface indicates statistical significance ( $p < 0.05$ ).  $p$ -value based on chi-square tests.

n, frequency; w%, weighted percentage; BRFSS, Behavioral Risk Factor Surveillance System; HPV, human papillomavirus.

**Appendix**  
**Geographic Variation in Human Papillomavirus Vaccination Initiation and Completion Among**  
**Young Adults in the U.S.**  
**Adjei Boakye et al.**

**Appendix Table 2.** Association Between Region of Residence and HPV Vaccination Uptake Among 18–26 Year Olds, BRFSS (2015–2017)

| Variable                               | AOR (95% CI)                        |                                     |
|----------------------------------------|-------------------------------------|-------------------------------------|
|                                        | HPV vaccine initiation<br>(n=3,258) | HPV vaccine completion<br>(n=3,258) |
| <b>Geographic region</b>               |                                     |                                     |
| Northeast                              | ref                                 | ref                                 |
| West/Midwest                           | <b>0.44 (0.33, 0.59)</b>            | <b>0.58 (0.42, 0.80)</b>            |
| Southern                               | <b>0.44 (0.34, 0.57)</b>            | <b>0.53 (0.40, 0.71)</b>            |
| <b>Sex</b>                             |                                     |                                     |
| Female                                 | ref                                 | ref                                 |
| Male                                   | 0.22 (0.18, 0.27)                   | 0.15 (0.11, 0.20)                   |
| <b>Race/Ethnicity</b>                  |                                     |                                     |
| Non-Hispanic White                     | ref                                 | ref                                 |
| Non-Hispanic Black                     | 0.96 (0.72, 1.27)                   | 0.39 (0.27, 0.57)                   |
| Hispanic                               | 0.91 (0.67, 1.24)                   | 0.64 (0.44, 0.95)                   |
| Non-Hispanic other                     | 0.88 (0.59, 1.31)                   | 0.69 (0.39, 1.21)                   |
| <b>Marital status</b>                  |                                     |                                     |
| Married                                | ref                                 | ref                                 |
| Not married                            | 1.08 (0.81, 1.44)                   | 1.29 (0.92, 1.82)                   |
| <b>Educational attainment</b>          |                                     |                                     |
| College graduate or higher             | ref                                 | ref                                 |
| Some college or associate degree       | 0.97 (0.72, 1.29)                   | 0.60 (0.44, 0.83)                   |
| High school diploma                    | 0.86 (0.63, 1.16)                   | 0.51 (0.36, 0.73)                   |
| Less than high school diploma          | 0.51 (0.33, 0.81)                   | 0.45 (0.24, 0.87)                   |
| <b>Income level</b>                    |                                     |                                     |
| >\$50,000                              | ref                                 | ref                                 |
| \$25,000 to \$49,999                   | 1.10 (0.81, 1.50)                   | 0.95 (0.65, 1.39)                   |
| <\$25,000                              | 0.79 (0.59, 1.05)                   | 0.80 (0.57, 1.12)                   |
| Refused/Missing                        | 0.65 (0.49, 0.87)                   | 0.57 (0.41, 0.79)                   |
| <b>Has insurance coverage</b>          |                                     |                                     |
| Yes                                    | ref                                 | ref                                 |
| No                                     | 0.72 (0.55, 0.95)                   | 0.74 (0.51, 1.09)                   |
| <b>Has regular provider</b>            |                                     |                                     |
| Yes                                    | ref                                 | ref                                 |
| No                                     | 0.79 (0.63, 1.00)                   | 0.77 (0.58, 1.02)                   |
| <b>Time since last medical checkup</b> |                                     |                                     |
| Within past year                       | ref                                 | ref                                 |
| More than a year                       | 0.84 (0.67, 1.05)                   | 0.87 (0.66, 1.15)                   |
| <b>General health</b>                  |                                     |                                     |
| Excellent/Very good                    | ref                                 | ref                                 |
| Good                                   | 0.84 (0.66, 1.06)                   | 0.94 (0.70, 1.26)                   |
| Poor/Fair                              | 0.99 (0.69, 1.41)                   | 0.92 (0.61, 1.39)                   |
| <b>Survey year</b>                     |                                     |                                     |
| 2017                                   | ref                                 | ref                                 |
| 2016                                   | 0.72 (0.55, 0.94)                   | 0.74 (0.54, 1.02)                   |
| 2015                                   | 1.16 (0.88, 1.53)                   | 1.34 (0.95, 1.87)                   |

*Note:* Boldface indicates statistical significance ( $p < 0.05$ ).

BRFSS, Behavioral Risk Factor Surveillance System; HPV, human papillomavirus.

**Appendix**  
**Geographic Variation in Human Papillomavirus Vaccination Initiation and Completion Among**  
**Young Adults in the U.S.**  
**Adjei Boakye et al.**

**Appendix Table 3.** Association Between Region of Residence and HPV Vaccination Uptake Among 18–34 Year Olds Stratified by Sex, BRFSS (2015–2017)

| Geographic region | AOR (95% CI)                        |                                     |
|-------------------|-------------------------------------|-------------------------------------|
|                   | HPV vaccine initiation<br>(n=3,258) | HPV vaccine completion<br>(n=3,258) |
| <b>Females</b>    |                                     |                                     |
| Northeast         | ref                                 | ref                                 |
| West/Midwest      | <b>0.65 (0.51, 0.82)</b>            | 0.82 (0.63, 1.08)                   |
| Southern          | <b>0.46 (0.37, 0.56)</b>            | <b>0.56 (0.45, 0.70)</b>            |
| <b>Males</b>      |                                     |                                     |
| Northeast         | ref                                 | ref                                 |
| West/Midwest      | <b>0.39 (0.28, 0.56)</b>            | <b>0.33 (0.20, 0.55)</b>            |
| Southern          | <b>0.51 (0.38, 0.67)</b>            | <b>0.60 (0.39, 0.94)</b>            |

*Note:* Boldface indicates statistical significance ( $p < 0.05$ ).

BRFSS, Behavioral Risk Factor Surveillance System; HPV, human papillomavirus.

**Appendix**  
**Geographic Variation in Human Papillomavirus Vaccination Initiation and Completion Among**  
**Young Adults in the U.S.**  
**Adjei Boakye et al.**

**Appendix Figure 1.** States that administered the optional adult HPV vaccination module.

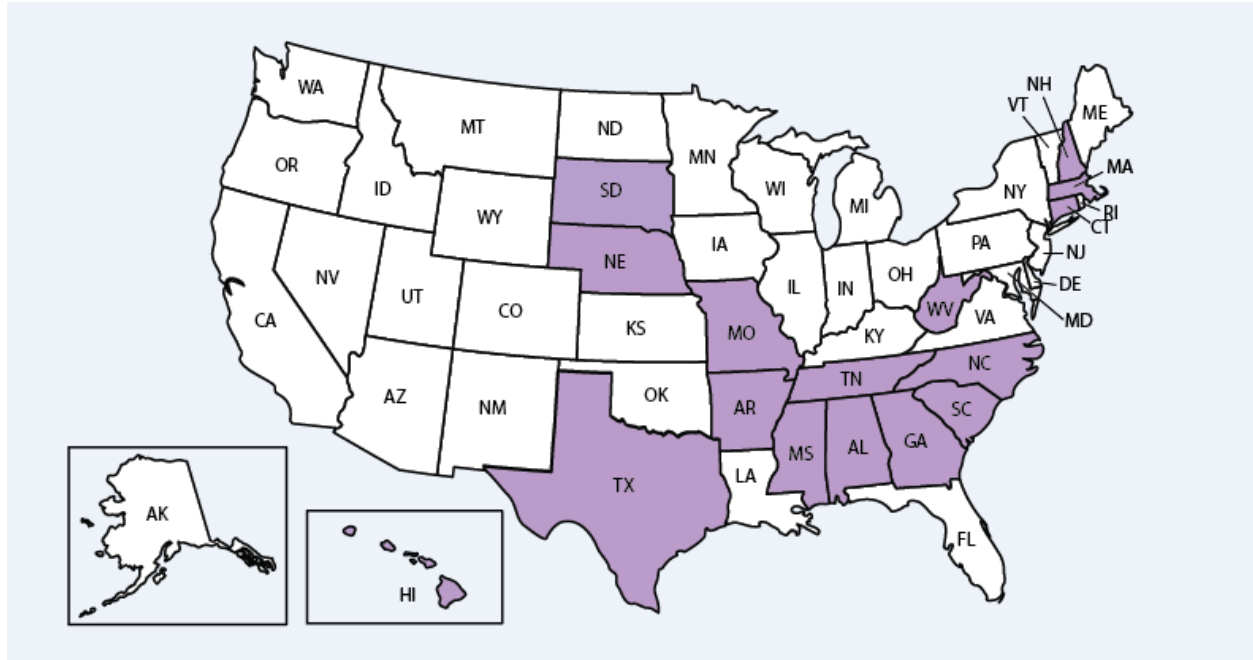

HPV, human papillomavirus.
